# Supplementary material for: Ultrahigh protein adsorption capacity and sustained release of nanocomposite scaffolds: implication for growth factor delivery systems
Source: Royal Society of Chemistry journal article supplement (doi:10.1039/c6ra28841c), 2017-01-01
Supplement: c6ra28841c1.pdf [file c6ra28841c1.pdf]

### Supplementary Figures

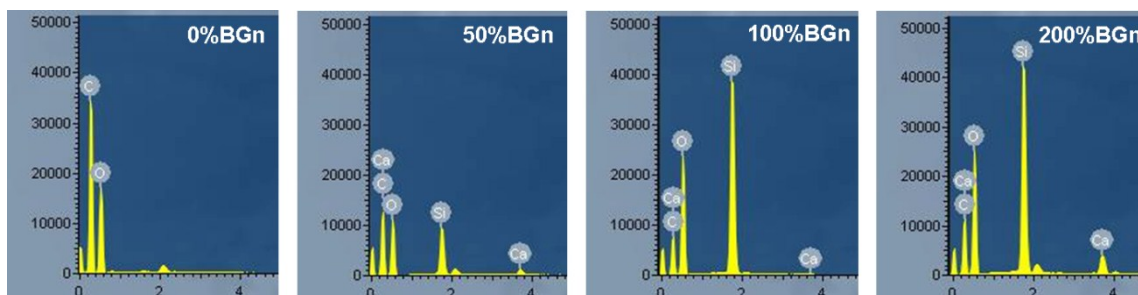

**Figure S1.** EDS atomic composition showing the presence of Si and Ca in the nanocomposite scaffolds.

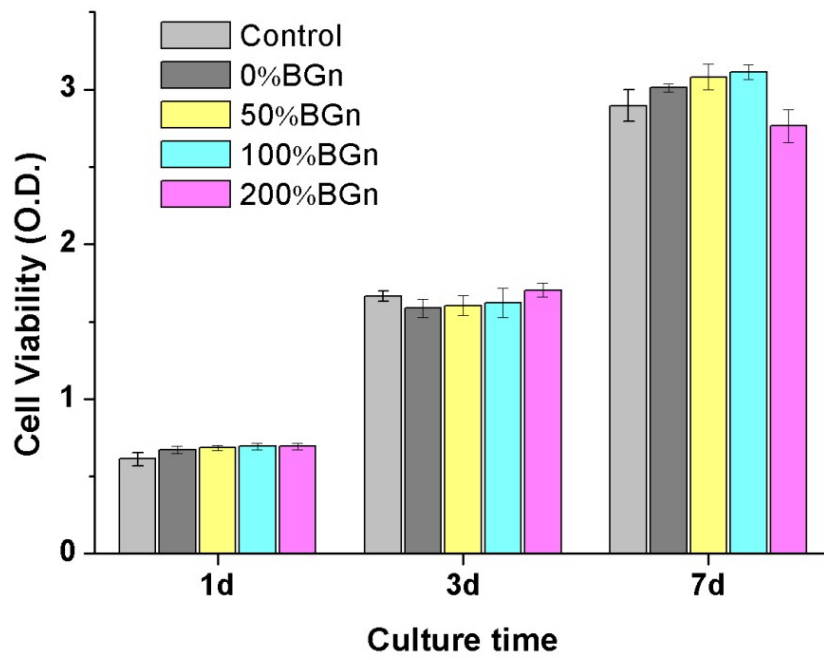

**Figure S2.** CCK assay of rMSCs when cultured with different compositions of scaffolds. Scaffolds showed no cytotoxicity over the test period.
